# Supplementary material for: Impacts of carrier trapping and ion migration on charge transport of perovskite solar cells with TiOx electron transport layer
Source: Royal Society of Chemistry journal article supplement (doi:10.1039/d0ra05082b), 2020-01-01
Supplement: d0ra05082b1.pdf [file d0ra05082b1.pdf]

## Supporting Information

### Impacts of carrier trapping and ion migration on charge transport of perovskite solar cells with $\text{TiO}_x$ electron transport layer

Ling Li,<sup>a</sup> Pengcheng Jia,<sup>a</sup> Wentao Bi,<sup>a</sup> Yang Tang,<sup>a</sup> Bo Song,<sup>a</sup> Liang Qin,<sup>\*a</sup> Zhidong Lou,<sup>a</sup> Yufeng Hu,<sup>a</sup> Feng Teng,<sup>a</sup> and Yanbing Hou<sup>\*a</sup>

<sup>a</sup> Key Laboratory of Luminescence and Optical Information, Ministry of Education, Beijing Jiaotong University, Beijing 100044, China.

Corresponding author, Tel.: +86 10 5168 4860

e-mails: [ybhou@bjtu.edu.cn](mailto:ybhou@bjtu.edu.cn) and [qinliang@bjtu.edu.cn](mailto:qinliang@bjtu.edu.cn)

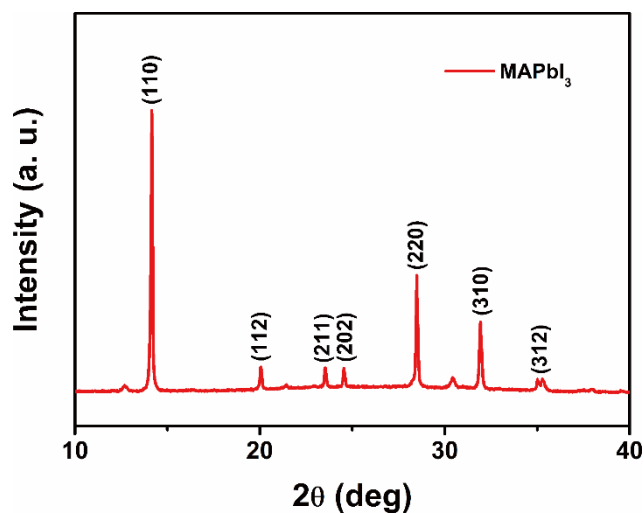

Figure S1. The XRD diffraction peak of MAPbI<sub>3</sub> film.

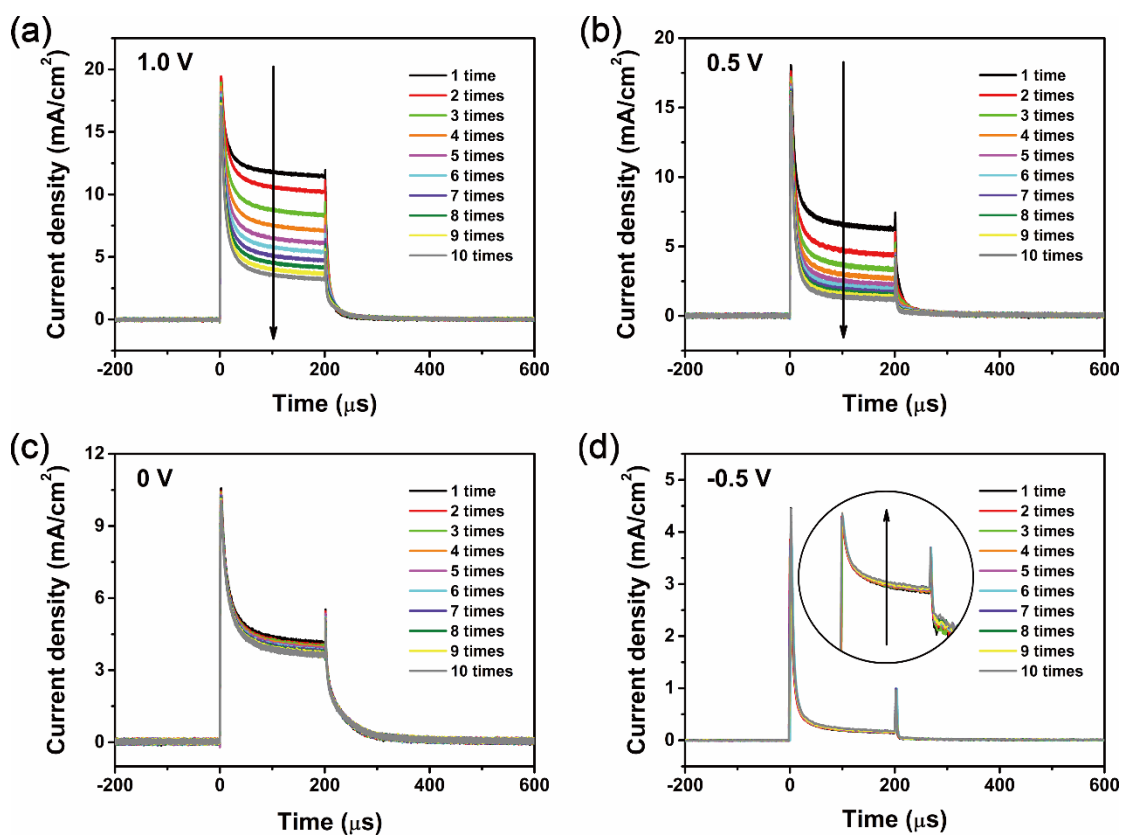

Figure S2. The transient photocurrent responses to first 10 light pulses. The interval between two adjacent pulses is several seconds. The devices under test were pretreated for 2 minutes at the biases of 1.0 V (a), 0.5 V (b), 0 V (c) and -0.5 V (d). The inset represents the magnified region of the -0.5 V processed transient photocurrent with the logarithm of the Y axis.
